# Supplementary material for: Postural Communication of Emotion: Perception of Distinct Poses of Five Discrete Emotions
Source: PubMed Central journal article supplement (PMC5432628; doi:10.3389/fpsyg.2017.00710), 2017-05-16

## DISTINCT POSES OF DISCRETE EMOTIONS

**Supplementary Figure 1.** Images of the male and female postural poses for each discrete emotion.

### Joy 1

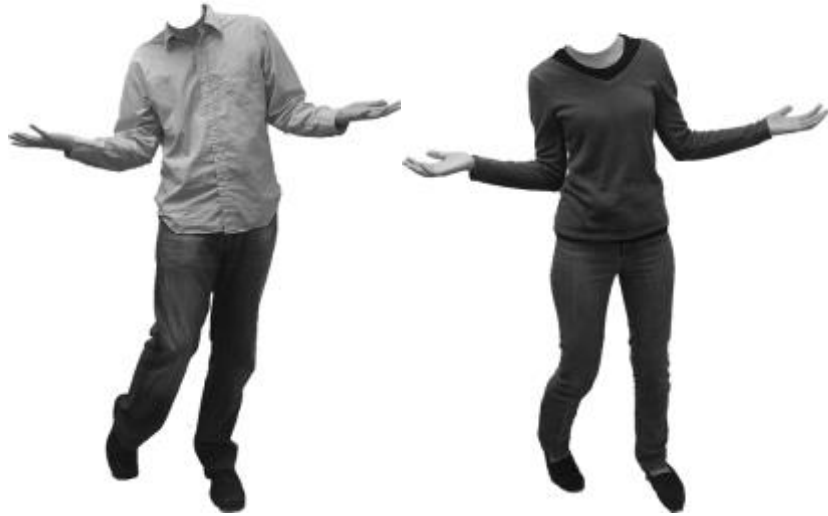

### Joy 2

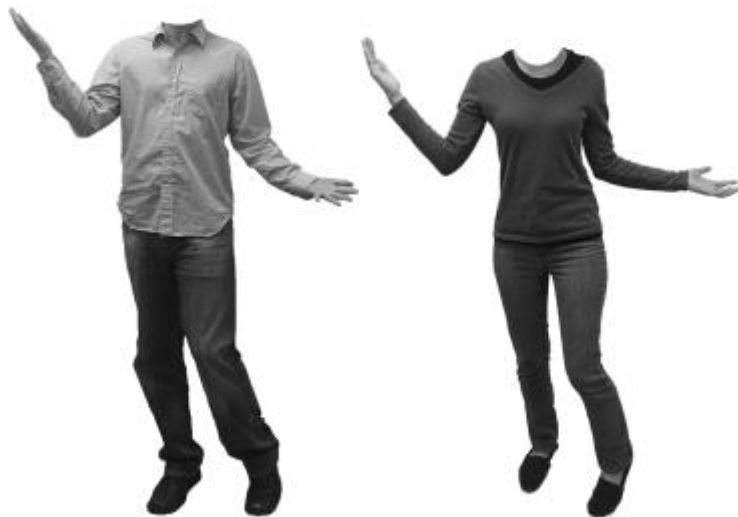

DISTINCT POSES OF DISCRETE EMOTIONS

**Joy 3**

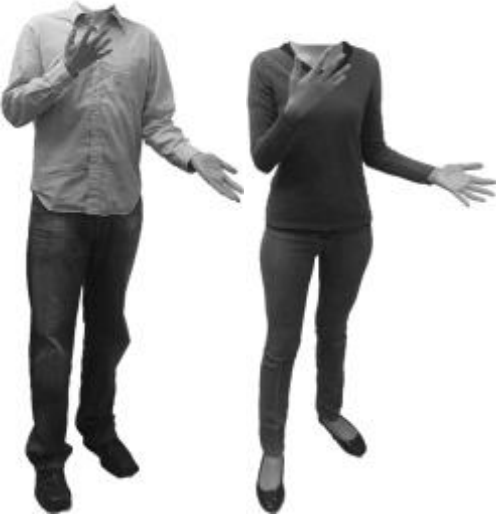

**Sadness 1**

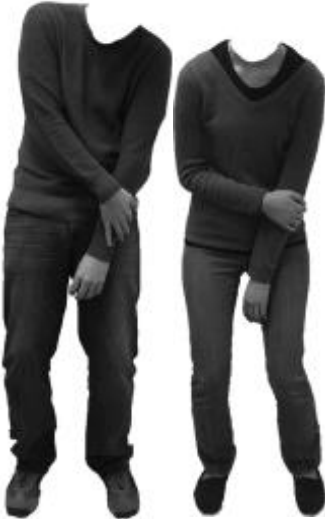

DISTINCT POSES OF DISCRETE EMOTIONS

**Sadness 2**

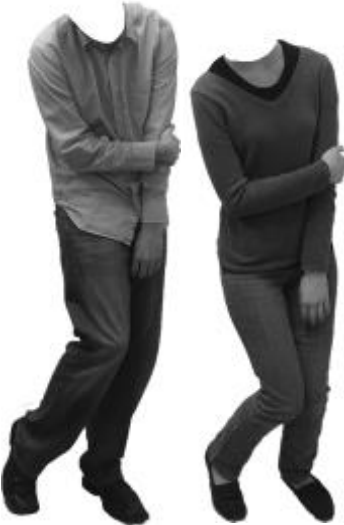

**Sadness 3**

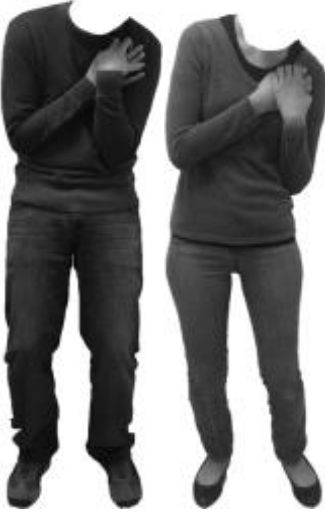

DISTINCT POSES OF DISCRETE EMOTIONS

**Sadness 4**

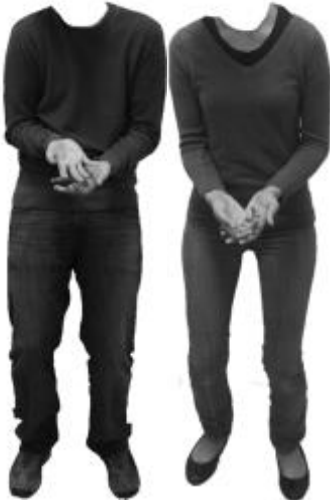

**Fear 1**

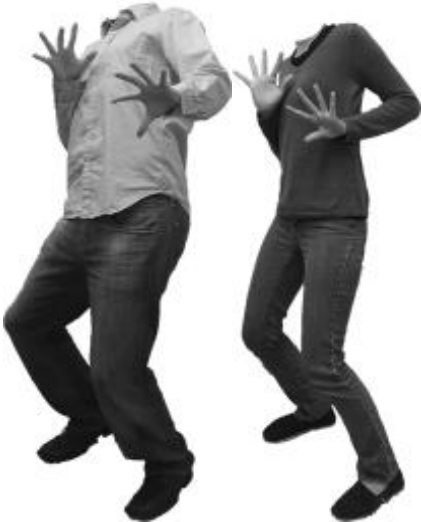

DISTINCT POSES OF DISCRETE EMOTIONS

**Fear 2**

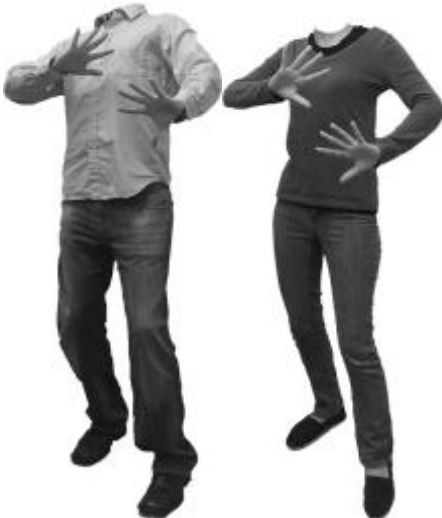

**Anger 1**

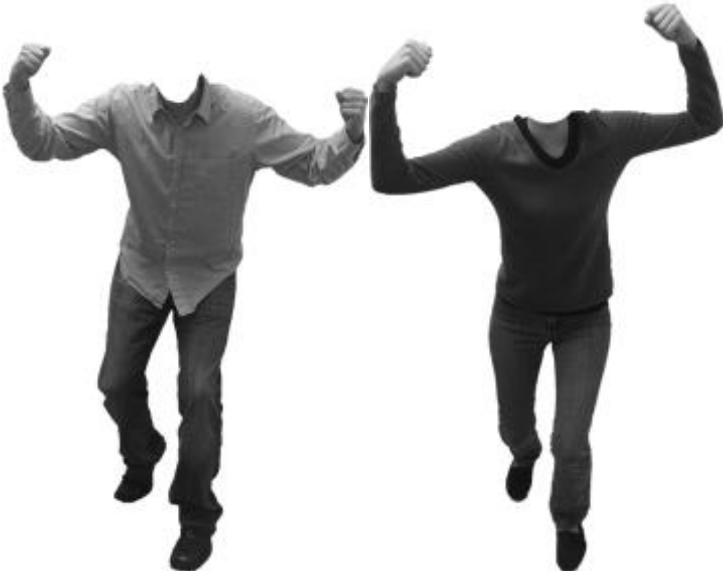

DISTINCT POSES OF DISCRETE EMOTIONS

**Anger 2**

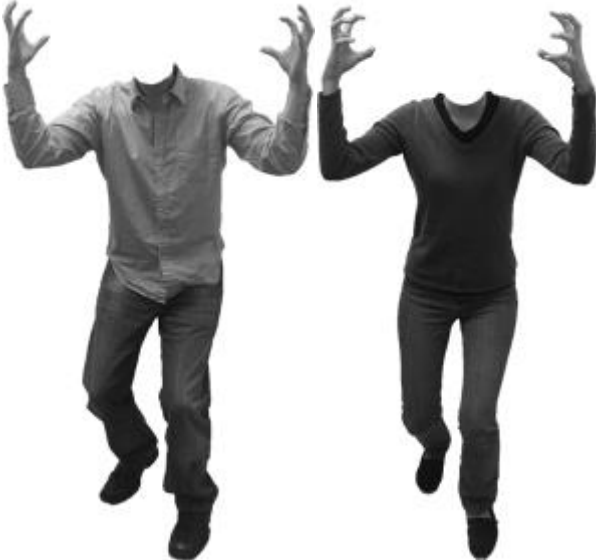

**Anger 3**

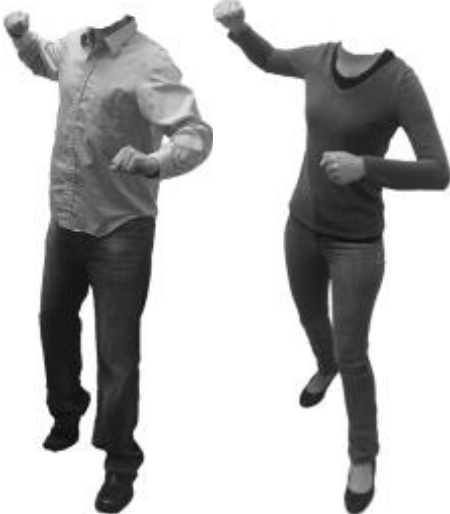

DISTINCT POSES OF DISCRETE EMOTIONS

**Disgust 1**

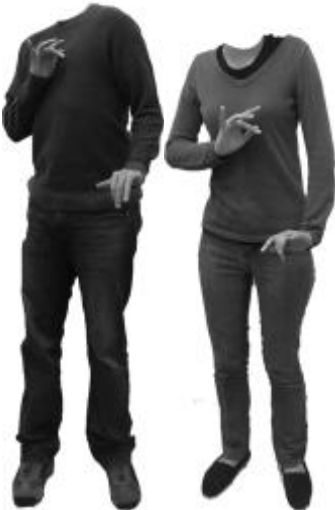

**Disgust 2**

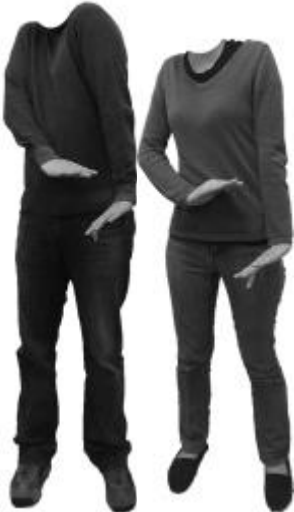

DISTINCT POSES OF DISCRETE EMOTIONS

**Disgust 3**

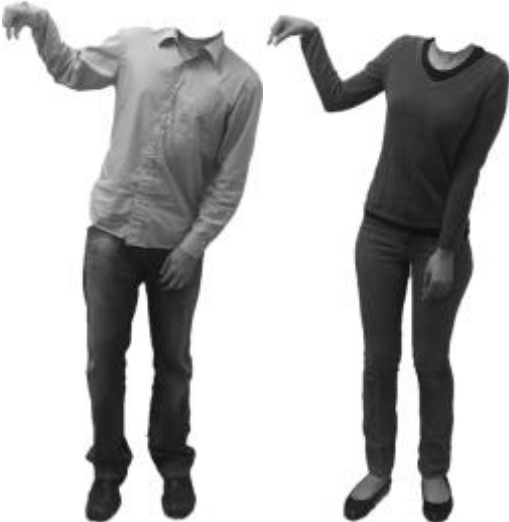

Supplement: Image_1.pdf [file Image_1.pdf]
