# Supplementary material for: Postural Communication of Emotion: Perception of Distinct Poses of Five Discrete Emotions
Source: PubMed Central journal article supplement (PMC5432628; doi:10.3389/fpsyg.2017.00710), 2017-05-16
Supplement: Table_1.pdf [file Table_1.pdf]

# DISTINCT POSES OF DISCRETE EMOTIONS

Supplementary Table 1.

*Proportion of emotion categorizations and mean dimensional ratings for each posture.*

| Posture   | Gender | Categorizations |             |             |             |             | Dimensions  |             |
|-----------|--------|-----------------|-------------|-------------|-------------|-------------|-------------|-------------|
|           |        | Joy             | Sadness     | Fear        | Anger       | Disgust     | Valence     | Arousal     |
| Joy 1     | M      | <b>0.88</b>     | 0.00        | 0.04        | 0.08        | 0.00        | 5.57 (1.89) | 5.52 (1.72) |
|           | F      | <b>0.77</b>     | 0.00        | 0.00        | 0.23        | 0.00        | 5.43 (1.63) | 5.86 (1.59) |
| Joy 2     | M      | <b>0.81</b>     | 0.00        | 0.04        | 0.15        | 0.00        | 6.43 (1.69) | 6.62 (1.20) |
|           | F      | <b>0.65</b>     | 0.00        | 0.04        | 0.31        | 0.00        | 5.00 (2.07) | 6.14 (1.93) |
| Joy 3     | M      | <b>0.58</b>     | 0.00        | 0.04        | 0.31        | 0.08        | 4.62 (1.50) | 6.14 (1.24) |
|           | F      | <b>0.46</b>     | 0.08        | 0.00        | 0.35        | 0.12        | 4.95 (1.91) | 5.90 (1.30) |
| Sadness 1 | M      | 0.04            | <b>0.81</b> | 0.12        | 0.00        | 0.04        | 3.67 (1.28) | 3.38 (1.69) |
|           | F      | 0.00            | <b>0.88</b> | 0.12        | 0.00        | 0.00        | 3.05 (1.32) | 3.71 (1.55) |
| Sadness 2 | M      | 0.08            | <b>0.70</b> | 0.23        | 0.00        | 0.00        | 2.95 (1.66) | 3.90 (1.64) |
|           | F      | 0.12            | <b>0.73</b> | 0.12        | 0.00        | 0.04        | 2.86 (1.65) | 4.05 (1.63) |
| Sadness 3 | M      | 0.04            | <b>0.85</b> | 0.12        | 0.00        | 0.00        | 3.19 (2.20) | 5.10 (2.32) |
|           | F      | 0.19            | <b>0.65</b> | 0.12        | 0.00        | 0.04        | 4.48 (2.99) | 5.19 (2.25) |
| Sadness 4 | M      | 0.12            | <b>0.50</b> | 0.19        | 0.12        | 0.08        | 3.86 (1.42) | 5.00 (1.34) |
|           | F      | 0.12            | <b>0.73</b> | 0.12        | 0.00        | 0.04        | 3.62 (1.43) | 5.19 (1.44) |
| Fear 1    | M      | 0.00            | 0.00        | <b>1.00</b> | 0.00        | 0.00        | 1.90 (1.26) | 8.10 (1.14) |
|           | F      | 0.04            | 0.00        | <b>0.85</b> | 0.00        | 0.12        | 2.57 (1.54) | 7.14 (1.59) |
| Fear 2    | M      | 0.00            | 0.00        | <b>0.96</b> | 0.00        | 0.04        | 2.19 (0.93) | 7.24 (1.64) |
|           | F      | 0.00            | 0.00        | <b>0.73</b> | 0.04        | 0.23        | 2.48 (1.17) | 6.48 (1.60) |
| Anger 1   | M      | 0.08            | 0.00        | 0.04        | <b>0.88</b> | 0.00        | 3.38 (2.92) | 7.71 (1.55) |
|           | F      | 0.27            | 0.00        | 0.04        | <b>0.69</b> | 0.00        | 4.57 (2.99) | 7.86 (1.42) |
| Anger 2   | M      | 0.00            | 0.00        | 0.00        | <b>1.00</b> | 0.00        | 1.95 (1.50) | 7.90 (1.48) |
|           | F      | 0.00            | 0.00        | 0.00        | <b>0.96</b> | 0.04        | 1.71 (1.27) | 8.19 (1.29) |
| Anger 3   | M      | 0.00            | 0.00        | 0.00        | <b>1.00</b> | 0.00        | 1.71 (1.31) | 8.19 (1.17) |
|           | F      | 0.08            | 0.00        | 0.04        | <b>0.88</b> | 0.00        | 1.90 (1.76) | 7.95 (1.28) |
| Disgust 1 | M      | 0.04            | 0.00        | 0.23        | 0.00        | <b>0.73</b> | 3.29 (1.71) | 6.62 (1.36) |
|           | F      | 0.04            | 0.00        | 0.12        | 0.00        | <b>0.85</b> | 3.52 (1.47) | 5.90 (2.02) |
| Disgust 2 | M      | 0.00            | 0.00        | 0.27        | 0.00        | <b>0.73</b> | 3.14 (1.74) | 5.76 (1.92) |
|           | F      | 0.04            | 0.00        | 0.23        | 0.00        | <b>0.73</b> | 3.19 (1.54) | 5.95 (1.56) |
| Disgust 3 | M      | 0.04            | 0.00        | 0.19        | 0.00        | <b>0.77</b> | 5.52 (1.78) | 5.81 (1.33) |
|           | F      | 0.00            | 0.00        | 0.19        | 0.00        | <b>0.81</b> | 4.55 (2.16) | 5.60 (1.39) |

*Note:* Target emotion is in bold. *SDs* included in parentheses for ratings of valence and arousal.
